# Supplementary material for: Integrating Multi-Criteria Decision Models in Smart Urban Planning: A Case Study of Architectural and Urban Design Competitions
Source: MDPI journal article supplement (doi:10.3390/smartcities7020033), 2024-03-18

LEVEL 3

FUNCTIONAL CRITERIA - LEVEL 3

| # | A1'1              | A1'2                     | A1               |
|---|-------------------|--------------------------|------------------|
| # | FLOOR SPACE INDEX | THE PLOT COVERAGE FACTOR | THE PARCEL YIELD |
| 1 | Optimal           | Too high                 | Good             |
| 2 | Optimal           | Just right               | Good             |
| 3 | Optimal           | Too low                  | Good             |
| 4 | Appropriate       | Too high                 | Good             |
| 5 | Appropriate       | Just right               | Good             |
| 6 | Appropriate       | Too low                  | Good             |
| 7 | Inappropriate     | Too high                 | Bad              |
| 8 | Inappropriate     | Just right               | Bad              |
| 9 | Inappropriate     | Too low                  | Bad              |

A1

Dimensional Representation in Cartesian Coordinate System 3D (x,y,z)



| # | A2'1                    | A2'2               | A2      |
|---|-------------------------|--------------------|---------|
| # | PLOT VOLUME SPACE INDEX | POPULATION DENSITY | DENSITY |
| 1 | Too high                | High               | High    |
| 2 | Too high                | Medium             | High    |
| 3 | Too high                | Low                | Medium  |
| 4 | Just right              | High               | Medium  |
| 5 | Just right              | Medium             | Medium  |
| 6 | Just right              | Low                | Medium  |
| 7 | Too low                 | High               | Medium  |
| 8 | Too low                 | Medium             | Low     |
| 9 | Too low                 | Low                | Low     |

A2

Dimensional Representation in Cartesian Coordinate System 3D (x,y,z)



PROGRAM CRITERIA AND ECONOMIC VIABILITY - LEVEL 3

| # | B1'1                     | B1'2                                   | B1            |
|---|--------------------------|----------------------------------------|---------------|
| # | NUMBER OF PARKING SPACES | RATIO BETWEEN PARKING SPACES AND FLATS | PARKING       |
| 1 | Enough                   | High                                   | Appropriate   |
| 2 | Enough                   | Normal                                 | Appropriate   |
| 3 | Enough                   | Moderate                               | Appropriate   |
| 4 | Not enough               | High                                   | Appropriate   |
| 5 | Not enough               | Normal                                 | Inappropriate |
| 6 | Not enough               | Moderate                               | Inappropriate |

B1

Dimensional Representation in Cartesian Coordinate System 3D (x,y,z)



| # | B2                |
|---|-------------------|
| # | RESIDENTIAL UNITS |
| 1 | Big               |
| 2 | Medium            |
| 3 | Small             |

B2

Dimensional Representation in Cartesian Coordinate System 2D (x,y)



| # | B3'1       | B3'2                      | B3         |
|---|------------|---------------------------|------------|
| # | INVESTMENT | PRICE OF RESIDENTIAL UNIT | INVESTMENT |
| 1 | High       | High                      | Too high   |
| 2 | High       | Normal                    | Too high   |
| 3 | High       | Low                       | Normal     |
| 4 | Normal     | High                      | Normal     |
| 5 | Normal     | Normal                    | Normal     |
| 6 | Normal     | Low                       | Normal     |
| 7 | Low        | High                      | Normal     |
| 8 | Low        | Normal                    | Low        |
| 9 | Low        | Low                       | Low        |

B3

Dimensional Representation in Cartesian Coordinate System 3D (x,y,z)



DESIGN CRITERIA - LEVEL 3

| # | C1            |
|---|---------------|
| # | FLOOR PLAN    |
| 1 | Developed     |
| 2 | Rigid         |
| 3 | Inappropriate |

C1

Dimensional Representation in Cartesian Coordinate System 2D (x,y)



| #  | C2'1        | C2'2       | C2'3                       | C2         |
|----|-------------|------------|----------------------------|------------|
| #  | FACADE      | LONG VIEWS | EXTERNAL RESIDENTIAL AREAS | APPEARANCE |
| 1  | Distracting | Bad        | Poor quality               | Bad        |
| 2  | Distracting | Bad        | Good quality               | Bad        |
| 3  | Distracting | Good       | Poor quality               | Bad        |
| 4  | Distracting | Good       | Good quality               | Acceptable |
| 5  | Appropriate | Bad        | Poor quality               | Acceptable |
| 6  | Appropriate | Bad        | Good quality               | Acceptable |
| 7  | Appropriate | Good       | Poor quality               | Acceptable |
| 8  | Appropriate | Good       | Good quality               | Acceptable |
| 9  | Diverse     | Bad        | Poor quality               | Bad        |
| 10 | Diverse     | Bad        | Good quality               | Acceptable |
| 11 | Diverse     | Good       | Poor quality               | Acceptable |
| 12 | Diverse     | Good       | Good quality               | Acceptable |
| 13 | Inspiring   | Bad        | Poor quality               | Bad        |
| 14 | Inspiring   | Bad        | Good quality               | Acceptable |
| 15 | Inspiring   | Good       | Poor quality               | Acceptable |
| 16 | Inspiring   | Good       | Good quality               | Excellent  |

C2

Dimensional Representation in Cartesian Coordinate System 4D (x,y,z,t)



| #  | C3'1        | C3'2                           | C3'3                            | C3          |
|----|-------------|--------------------------------|---------------------------------|-------------|
| #  | LANDSCAPING | ACCESSIBILITY AND PERMEABILITY | COHERENCE WITH THE SURROUNDINGS | LANDSCAPING |
| 1  | Bad         | Poorly Transient               | Inconsistent                    | Distracting |
| 2  | Bad         | Transient                      | Inconsistent                    | Distracting |
| 3  | Bad         | Impermanent                    | Inconsistent                    | Distracting |
| 4  | Good        | Poorly Transient               | Inconsistent                    | Appropriate |
| 5  | Good        | Transient                      | Inconsistent                    | Appropriate |
| 6  | Good        | Impermanent                    | Inconsistent                    | Appropriate |
| 7  | Excellent   | Poorly Transient               | Inconsistent                    | Appropriate |
| 8  | Excellent   | Transient                      | Inconsistent                    | Appropriate |
| 9  | Excellent   | Impermanent                    | Inconsistent                    | Appropriate |
| 10 | Bad         | Poorly Transient               | Consistent                      | Appropriate |
| 11 | Bad         | Transient                      | Consistent                      | Appropriate |
| 12 | Bad         | Impermanent                    | Consistent                      | Appropriate |
| 13 | Good        | Poorly Transient               | Consistent                      | Distracting |
| 14 | Good        | Transient                      | Consistent                      | Appropriate |
| 15 | Good        | Impermanent                    | Consistent                      | Appropriate |
| 16 | Excellent   | Poorly Transient               | Consistent                      | Appropriate |
| 17 | Excellent   | Transient                      | Consistent                      | Inspiring   |
| 18 | Excellent   | Impermanent                    | Consistent                      | Inspiring   |

C3

Dimensional Representation in Cartesian Coordinate System 4D (x,y,z,t)



LEVEL 2

FUNCTIONAL CRITERIA - LEVEL 2

| # | A1               | A2      | A                   |
|---|------------------|---------|---------------------|
| # | THE PARCEL YIELD | DENSITY | FUNCTIONAL CRITERIA |
| 1 | Good             | Low     | Optimal             |
| 2 | Bad              | Low     | Suitable            |
| 3 | Good             | Medium  | Suitable            |
| 4 | Bad              | Medium  | Suitable            |
| 5 | Good             | High    | Suitable            |
| 6 | Bad              | High    | Unsuitable          |

A

Dimensional Representation in Cartesian Coordinate System 3D (x,y,z)



PROGRAM CRITERIA AND ECONOMIC VIABILITY - LEVEL 2

| #  | B1            | B2                        | B3         | B                                       |
|----|---------------|---------------------------|------------|-----------------------------------------|
| #  | PARKING       | PRICE OF RESIDENTIAL UNIT | INVESTMENT | PROGRAM CRITERIA AND ECONOMIC VIABILITY |
| 1  | Appropriate   | Big                       | Too high   | Unacceptable                            |
| 2  | Appropriate   | Big                       | Normal     | Good                                    |
| 3  | Appropriate   | Big                       | Low        | Excellent                               |
| 4  | Appropriate   | Medium                    | Too high   | Good                                    |
| 5  | Appropriate   | Medium                    | Normal     | Good                                    |
| 6  | Appropriate   | Medium                    | Low        | Excellent                               |
| 7  | Appropriate   | Small                     | Too high   | Unacceptable                            |
| 8  | Appropriate   | Small                     | Normal     | Good                                    |
| 9  | Appropriate   | Small                     | Low        | Excellent                               |
| 10 | Inappropriate | Big                       | Too high   | Good                                    |
| 11 | Inappropriate | Big                       | Normal     | Good                                    |
| 12 | Inappropriate | Big                       | Low        | Unacceptable                            |
| 13 | Inappropriate | Medium                    | Too high   | Unacceptable                            |
| 14 | Inappropriate | Medium                    | Normal     | Good                                    |
| 15 | Inappropriate | Medium                    | Low        | Good                                    |
| 16 | Inappropriate | Small                     | Too high   | Unacceptable                            |
| 17 | Inappropriate | Small                     | Normal     | Unacceptable                            |
| 18 | Inappropriate | Small                     | Low        | Unacceptable                            |

B

Dimensional Representation in Cartesian Coordinate System 4D (x,y,z,t)



DESIGN CRITERIA - LEVEL 2

| #  | C1            | C2         | C3          | C               |
|----|---------------|------------|-------------|-----------------|
| #  | FLOOR PLAN    | APPEARANCE | LANDSCAPING | DESIGN CRITERIA |
| 1  | Developed     | Bad        | Distracting | Acceptable      |
| 2  | Developed     | Bad        | Appropriate | Acceptable      |
| 3  | Developed     | Bad        | Inspiring   | Acceptable      |
| 4  | Developed     | Acceptable | Distracting | Good            |
| 5  | Developed     | Acceptable | Appropriate | Good            |
| 6  | Developed     | Acceptable | Inspiring   | Good            |
| 7  | Developed     | Excellent  | Distracting | Good            |
| 8  | Developed     | Excellent  | Appropriate | Excellent       |
| 9  | Developed     | Excellent  | Inspiring   | Excellent       |
| 10 | Rigid         | Bad        | Distracting | Acceptable      |
| 11 | Rigid         | Bad        | Appropriate | Acceptable      |
| 12 | Rigid         | Bad        | Inspiring   | Acceptable      |
| 13 | Rigid         | Acceptable | Distracting | Acceptable      |
| 14 | Rigid         | Acceptable | Appropriate | Acceptable      |
| 15 | Rigid         | Acceptable | Inspiring   | Acceptable      |
| 16 | Rigid         | Excellent  | Distracting | Acceptable      |
| 17 | Rigid         | Excellent  | Appropriate | Acceptable      |
| 18 | Rigid         | Excellent  | Inspiring   | Acceptable      |
| 19 | Inappropriate | Bad        | Distracting | Unacceptable    |
| 20 | Inappropriate | Bad        | Appropriate | Unacceptable    |
| 21 | Inappropriate | Bad        | Inspiring   | Unacceptable    |
| 22 | Inappropriate | Acceptable | Distracting | Unacceptable    |
| 23 | Inappropriate | Acceptable | Appropriate | Unacceptable    |
| 24 | Inappropriate | Acceptable | Inspiring   | Unacceptable    |
| 25 | Inappropriate | Excellent  | Distracting | Unacceptable    |
| 26 | Inappropriate | Excellent  | Appropriate | Unacceptable    |
| 27 | Inappropriate | Excellent  | Inspiring   | Unacceptable    |

C

Dimensional Representation in Cartesian Coordinate System 4D (x,y,z,t)



LEVEL 1

ALL CRITERIA - LEVEL 1

| #  | A                   | B                                       | C               | SCORE        |
|----|---------------------|-----------------------------------------|-----------------|--------------|
| #  | FUNCTIONAL CRITERIA | PROGRAM CRITERIA AND ECONOMIC VIABILITY | DESIGN CRITERIA | ALTERNATIVE  |
| 1  | Optimal             | Unacceptable                            | Unacceptable    | Unacceptable |
| 2  | Optimal             | Unacceptable                            | Acceptable      | Good         |
| 3  | Optimal             | Unacceptable                            | Good            | Good         |
| 4  | Optimal             | Unacceptable                            | Excellent       | Good         |
| 5  | Optimal             | Good                                    | Unacceptable    | Unacceptable |
| 6  | Optimal             | Good                                    | Acceptable      | Good         |
| 7  | Optimal             | Good                                    | Good            | Good         |
| 8  | Optimal             | Good                                    | Excellent       | Excellent    |
| 9  | Optimal             | Excellent                               | Unacceptable    | Good         |
| 10 | Optimal             | Excellent                               | Acceptable      | Excellent    |
| 11 | Optimal             | Excellent                               | Good            | Excellent    |
| 12 | Optimal             | Excellent                               | Excellent       | Excellent    |
| 13 | Suitable            | Unacceptable                            | Unacceptable    | Unacceptable |
| 14 | Suitable            | Unacceptable                            | Acceptable      | Good         |
| 15 | Suitable            | Unacceptable                            | Good            | Good         |
| 16 | Suitable            | Unacceptable                            | Excellent       | Good         |
| 17 | Suitable            | Good                                    | Unacceptable    | Unacceptable |
| 18 | Suitable            | Good                                    | Acceptable      | Good         |
| 19 | Suitable            | Good                                    | Good            | Good         |
| 20 | Suitable            | Good                                    | Excellent       | Good         |
| 21 | Suitable            | Excellent                               | Unacceptable    | Unacceptable |
| 22 | Suitable            | Excellent                               | Acceptable      | Good         |
| 23 | Suitable            | Excellent                               | Good            | Good         |
| 24 | Suitable            | Excellent                               | Excellent       | Good         |
| 25 | Unsuitable          | Unacceptable                            | Unacceptable    | Unacceptable |
| 26 | Unsuitable          | Unacceptable                            | Acceptable      | Unacceptable |
| 27 | Unsuitable          | Unacceptable                            | Good            | Unacceptable |
| 28 | Unsuitable          | Unacceptable                            | Excellent       | Unacceptable |
| 29 | Unsuitable          | Good                                    | Unacceptable    | Unacceptable |
| 30 | Unsuitable          | Good                                    | Acceptable      | Unacceptable |
| 31 | Unsuitable          | Good                                    | Good            | Unacceptable |
| 32 | Unsuitable          | Good                                    | Excellent       | Unacceptable |
| 33 | Unsuitable          | Excellent                               | Unacceptable    | Unacceptable |
| 34 | Unsuitable          | Excellent                               | Acceptable      | Unacceptable |
| 35 | Unsuitable          | Excellent                               | Good            | Excellent    |
| 36 | Unsuitable          | Excellent                               | Excellent       | Excellent    |

SCORE

Dimensional Representation in Cartesian Coordinate System 4D (x,y,z,t)



Supplement: s1 [file s1]
